# Supplementary material
Source: PubMed Central journal article supplement (PMC4733563)
Supplement: NIHMS726008-supplement-supplement.pdf [file NIHMS726008-supplement-supplement.pdf]

# Magnetoferritin Loading

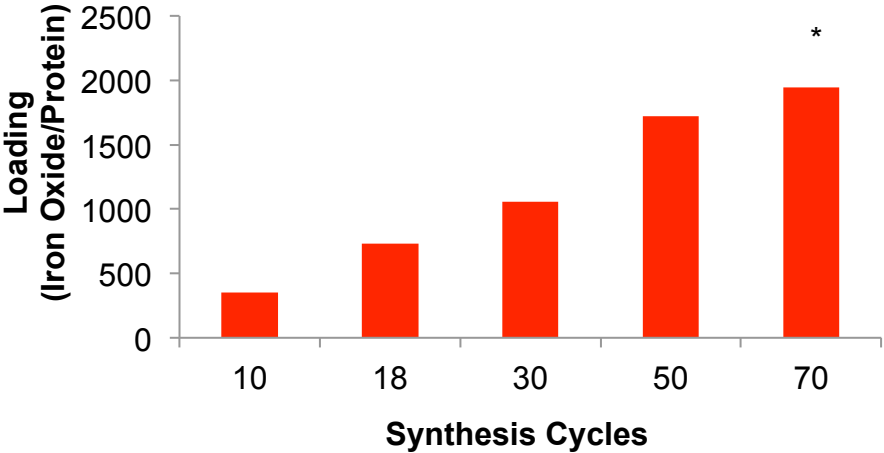

Tailored loading of magnetoferritin NPs. Results showed that as the number of synthesis cycles was increased, the loading (iron oxide per protein) of magnetoferritin NPs also increased. Furthermore, results demonstrated that as the number of synthesis cycles is increased, the loading begins to plateau between 50 and 70 cycles. All data shown represents one experiment. Although the data shown for 70 cycle demonstrates lower loading than that described earlier, this data point represents one data set of the repeated results.
